# Supplementary material
Source: PubMed Central journal article supplement (PMC3045570)

# Supplement Facts

Serving Size 2 Packets

| Amount Per 2 Packets                                                                                                                                                                         | %Daily Value   | Amount Per 2 Packets                                                                                                       | %Daily Value |
|----------------------------------------------------------------------------------------------------------------------------------------------------------------------------------------------|----------------|----------------------------------------------------------------------------------------------------------------------------|--------------|
| Calories                                                                                                                                                                                     | 20             | Vanadium (as vanadium amino acid chelate)                                                                                  | 26 mcg *     |
| Calories from Fat                                                                                                                                                                            | 20             | Boron (as boron citrate)                                                                                                   | 3.2 mg *     |
| Total Fat                                                                                                                                                                                    | 2 g 4%         | N-Acetyl-L-Cysteine                                                                                                        | 1,000 mg *   |
| Saturated Fat                                                                                                                                                                                | 0 g 0%         | L-Methionine                                                                                                               | 14 mg *      |
| Polysaturated Fat                                                                                                                                                                            | 2 g *          | SerinAid™                                                                                                                  | 668 mg *     |
| Vitamin A (15% (2,500 IU) as vitamin A acetate, 27% (4,668 IU) as natural carotenes (alpha, beta, cryptoxanthin, zeaxanthin, and lutein from D. salina and 58% (10,000 IU) as beta carotene) | 17,168 IU 343% | Phosphatidylserine 334mg*                                                                                                  |              |
| Vitamin C (as ascorbic acid and rose hips)                                                                                                                                                   | 1,080 mg 1800% | Phosphatidylcholine 80mg*                                                                                                  |              |
| Vitamin D (from fish liver oil and cholecalciferol)                                                                                                                                          | 1,500 IU 375%  | Phosphatidylethanolamine 88mg*                                                                                             |              |
| Vitamin E (as mixed tocopherols and d-alpha tocopheryl acetate)                                                                                                                              | 600 IU 2000%   | Phosphatidylinositol 44mg*                                                                                                 |              |
| MenaQ7™ Natural Vitamin K2™                                                                                                                                                                  | 45 mcg 56%     | Glutamic Acid (as glutamic acid hydrochloride)                                                                             | 60 mg *      |
| Thiamin (as thiamin hydrochloride)                                                                                                                                                           | 100 mg 6667%   | Betaine (as betaine hydrochloride)                                                                                         | 100 mg *     |
| Riboflavin                                                                                                                                                                                   | 50 mg 2941%    | Lutein (dried extract, marigold flower)                                                                                    | 6 mg *       |
| Niacin (as niacinamide)                                                                                                                                                                      | 100 mg 500%    | Lycopene (natural)                                                                                                         | 10 mg *      |
| Vitamin B6 (as pyridoxine hydrochloride)                                                                                                                                                     | 50 mg 2500%    | Ginkgo Biloba (leaf, dried extract, min. 24% ginkgo flavone glycosides, 6% ginkgo terpene lactones, <1 ppm ginkgolic acid) | 100 mg *     |
| Folic Acid                                                                                                                                                                                   | 800 mcg 200%   | Alpha Lipoic Acid                                                                                                          | 400 mg *     |
| Vitamin B12 (as cyanocobalamin)                                                                                                                                                              | 250 mcg 4167%  | Zeaxanthin (dried extract, marigold flower)                                                                                | 1 mg *       |
| Biotin FCC                                                                                                                                                                                   | 200 mcg 100%   | DHAE (as dimethylaminoethanol bitartrate)                                                                                  | 100 mg *     |
| Pantothenic Acid (as d-calcium pantothenate)                                                                                                                                                 | 250 mg 2500%   | Acetyl-L-Carnitine                                                                                                         | 500 mg *     |
| Calcium (as calcium carbonate/caseinate/citrate)                                                                                                                                             | 1,500 mg 150%  | L-Carnosine                                                                                                                | 500 mg *     |
| Iodine (as kelp)                                                                                                                                                                             | 150 mcg 100%   | Grape Seed Extract (Vitis vinifera) seed, dried extract, min. 95% proanthocyanidins                                        | 50 mg *      |
| Magnesium (as magnesium citrate/citrate)                                                                                                                                                     | 420 mg 105%    | Inositol (as inositol hexanicotinate)                                                                                      | 200 mg *     |
| Zinc (as zinc picolinate)                                                                                                                                                                    | 26 mg 173%     | Co Enzyme Q10 (as ubiquinone)                                                                                              | 200 mg *     |
| Selenium (as L-selenomethionine)                                                                                                                                                             | 100 mcg 143%   | Marine Lipid Concentrate                                                                                                   | 2,000 mg *   |
| Copper (as copper amino acid chelate)                                                                                                                                                        | 2 mg 100%      | EPA - eicosapentaenoic acid                                                                                                | 660 mg *     |
| Manganese (as manganese glycinate, sulfate)                                                                                                                                                  | 20 mg 1000%    | DHA - docosahexaenoic acid                                                                                                 | 500 mg *     |
| Chromium (as chromium polynicotinate)                                                                                                                                                        | 200 mcg 167%   | Proprietary Blend:                                                                                                         | 120 mg *     |
| Molybdenum (as molybdenum amino acid chelate)                                                                                                                                                | 200 mcg 267%   | Betaine HCl, Glutamic Acid HCl, Alfalfa, Soy Protein, Lecithin, and Boron Citrate.                                         |              |
| Potassium (as potassium chloride)                                                                                                                                                            | 200 mg 6%      |                                                                                                                            |              |
| PABA (as para-aminobenzoic acid)                                                                                                                                                             | 26 mg *        |                                                                                                                            |              |
| Choline (as choline bitartrate)                                                                                                                                                              | 500 mg *       |                                                                                                                            |              |

Other Ingredients: Gelatin, glycerin, ricebran oil, cellulose, magnesium stearate, silicon dioxide, croscamellose sodium, natural mixed tocopherol vitamin E, stearic acid, natural lemon oil, yellow beeswax, annatto extract, titanium dioxide, rosemary extract, water, vegetable stearate, and silica.  
MenaQ7™ is a trademark of HattoPharma, Norway. Patents Pending  
SerinAid™ is a registered trademark of Chemi Nutraceuticals.

\* Daily Value not established.  
† Percent Daily Values are based on a 2,000 calorie diet.

A

## Telomere Spot Analysis

Lymphocytes

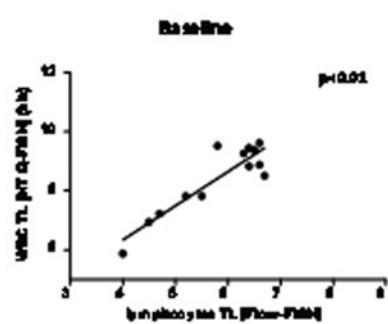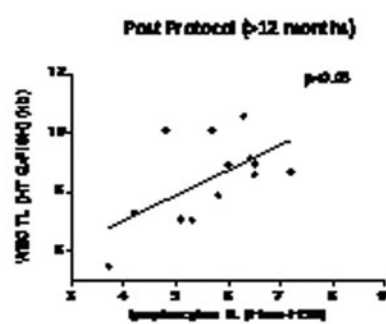

Granulocytes

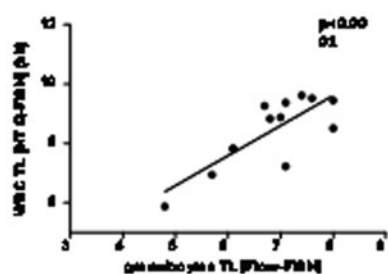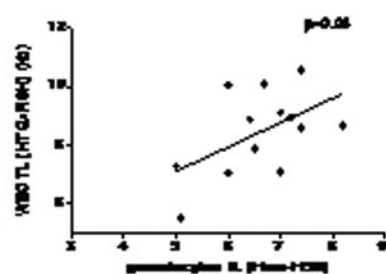

B

## Nucleus Analysis

Lymphocytes

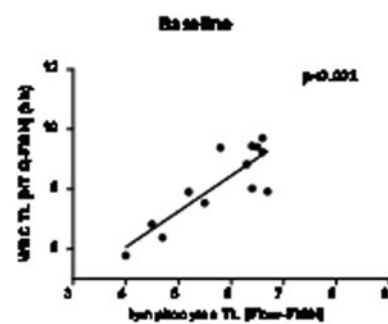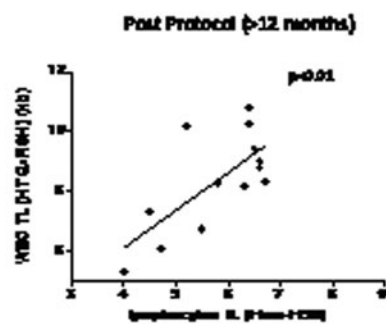

Granulocytes

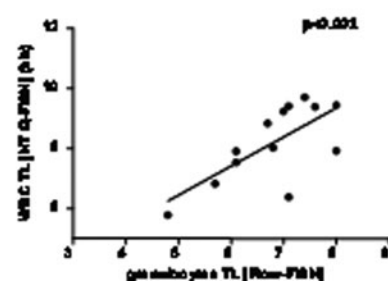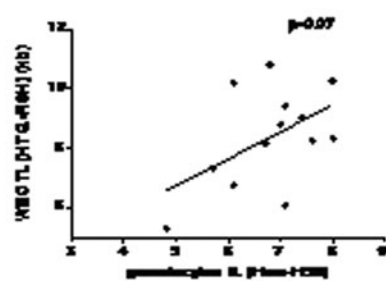

Supplement: Supp_Data.pdf [file Supp_Data.pdf]
